# Supplementary material for: Prevalence of maternal psychological disorders after immediate postpartum hemorrhage: a repeated nested cross-sectional survey in a cohort study
Source: Research Square preprint supplement (doi:10.21203/rs.3.rs-8320120/v1), 2026-01-20
Supplement: Supplementary file 2 [file 9d1b5d94fa8e03775f2b304f.docx]

**SUPPLEMENTARY FILE 1.** Schedule of enrollment, interventions and assessments of women for the PSYCHE study

**DELIVERY**

**RETURN HOME**

| **MATERNITY**  **UNIT** | **HOME** |
| --- | --- |
|  |  |
|  |  |

| **INCLUSION** | **M 2** | **M 6** | **M 12** |
| --- | --- | --- | --- |
| **QUESTIONNAIRES** | | | |
| MINI | Ø | MINI | MINI |
| Ø | EPDS | EPDS | EPDS |
| STAI Y-A | STAI Y-A | STAI Y-A | STAI Y-A |
| Ø | GAD-7 | GAD-7 | GAD-7 |
| STAI Y-B | Ø | Ø | Ø |
| Ø | IES-R | IES-R | IES-R |

Abbreviation: M = month. MINI = Mini-International Neuropsychiatric Interview (Major depressive episode). EPDS = Edinburgh Postnatal Depression Scale. STAI Y-A and Y-B = Spielberger's State-Trait Anxiety Inventory. GAD-7 = Generalized Anxiety Disorder-7. IES-R = Revised impact of event scale.
