# Supplementary material for: Prevalence of maternal psychological disorders after immediate postpartum hemorrhage: a repeated nested cross-sectional survey in a cohort study
Source: Research Square preprint supplement (doi:10.21203/rs.3.rs-8320120/v1), 2026-01-20
Supplement: Supplementary file 3 [file e01b45d41bb1008156ee14da.docx]

**SUPPLEMENTARY FILE 2.** Flow chart

7274 births

Including 887 PPH

819 eligible women with PPH

**Exposed group**

= women with

PPH

n (*%*)

**Unexposed group**

= women without

PPH

n (*%*)

**N=1298**

women included

**770**

**528**

**INCLUSION**

489

*(63.5)*

324

*(61.3)*

**M2**

**M6**

324

*(42.1)*

239

*(45.3)*

**M12**

284

*(36.9)*

193

*(36.5)*

Abbreviation: M = month. PPH = postpartum hemorrhage.
