# Supplementary material for: Prevalence of maternal psychological disorders after immediate postpartum hemorrhage: a repeated nested cross-sectional survey in a cohort study
Source: Research Square preprint supplement (doi:10.21203/rs.3.rs-8320120/v1), 2026-01-20
Supplement: Supplementary file 4 [file eae4f2aeb3e993068e557b13.docx]

**SUPPLEMENTARY FILE 3.** Data concerning the psychiatric or psychological resources of women with or without PPH at 2, 6, and 12 months

|  | **M2** | |  | **M6** | |  | **M12** | |  |
| --- | --- | --- | --- | --- | --- | --- | --- | --- | --- |
|  | **Women with PPH N=329  % (n)** | **Women without PPH N=491 % (n)** | ***P*** | **Women with PPH**  **N=241  % (n)** | **Women without PPH**  **N=331 % (n)** | ***P*** | **Women with PPH**  **N=197  % (n)** | **Women without PPH**  **N=288 % (n)** | ***P*** |
| **Received psychological or psychiatric treatment since delivery** | (21) | (14) |  | (14) | (13) |  | (14) | (11) |  |
|  | 6.4 | 2.9 | 0.01 | 5.8 | 3.9 | 0.29 | 7.1 | 3.8 | 0.11 |
| From: | (21) | (14) |  | (14) | (13) |  | (14) | (11) |  |
| Psychiatrist | 38.1 | 42.9 | 0.84 | 35.7 | 38.5 | 0.57 | 42.9 | 54.6 | 0.56 |
| Psychologist | 52.4 | 50.0 |  | 57.1 | 53.9 |  | 57.1 | 45.5 |  |
| Both | 4.8 | 7.1 |  | 0 | 7.7 |  | 0 | 0 |  |
| Other | 4.8 | 0 |  | 4.1 | 0 |  | 0 | 0 |  |
| **Medication related to a psychiatric disorder** | 5.2 | 1.8 | 0.007 | 5.0 | 1.5 | 0.01 | 4.6 | 3.1 | 0.41 |

Abbreviation: PPH = postpartum hemorrhage. SD = standard deviation. M2 = 2 months postpartum. M6 = 6 months postpartum. M12 = 12 months postpartum.
